# Supplementary material for: Evaluation of an empiric risk screening score to identify acute and early HIV-1 infection among MSM in Coastal Kenya
Source: PubMed Central journal article supplement — AIDS. 2013 Aug 7;27(13):2163–6. doi: 10.1097/QAD.0b013e3283629095 (PMC3748854; doi:10.1097/qad.0b013e3283629095), 2013-08-07
Supplement: aids-27-2163-s001.pdf [file aids-27-2163-s001.pdf]

Supplemental figure: Evaluation of an empiric risk screening score to identify acute and early HIV-1 infection among MSM in Coastal Kenya

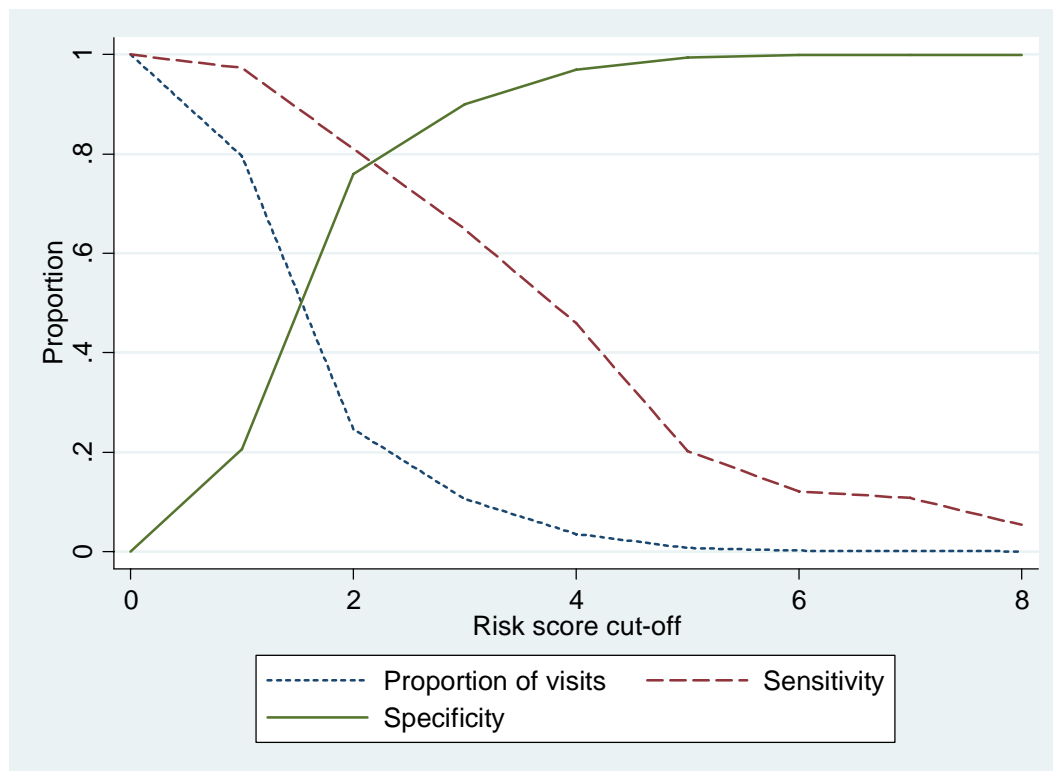

Assessment of sensitivity, specificity and the optimal cut-off of the cohort-derived screening score (CDRSS) to identify acute and early HIV-1 (AEHI) infection among MSM followed in a longitudinal cohort in Coastal Kenya. The Y-axis shows the proportion of study visits. The X-axis shows the cut-off of the CDRSS. At a cut-off of 2, the CDRSS has 80.8% sensitivity, and 76.0% specificity to detect an AEHI-visit, for 24.6% of visits needing AEHI evaluation.
